# Supplementary material for: Novel Bi2S3/Bi2O2CO3 heterojunction photocatalysts with enhanced visible light responsive activity and wastewater treatment
Source: Royal Society of Chemistry journal article supplement (doi:10.1039/c3ta13931j), 2013-12-20
Supplement: c3ta13931j.pdf [file c3ta13931j.pdf]

Supporting Information For:

## Novel $\text{Bi}_2\text{S}_3/\text{Bi}_2\text{O}_2\text{CO}_3$ heterojunction photocatalysts with enhanced visible light responsive activity and wastewater treatment

Na Liang<sup>a</sup>, Jiantao Zai<sup>\*a</sup>, Miao Xu<sup>a</sup>, Qi Zhu<sup>a</sup>, Xiao Wei<sup>a</sup> and Xuefeng Qian<sup>\*a</sup>

School of Chemistry and Chemical Engineering

State Key Laboratory of Metal Matrix Composites

Shanghai Jiao Tong University, Shanghai, 200240 (P. R. China)

E-mail: xfqian@sjtu.edu.cn; zaijiantao@sjtu.edu.cn

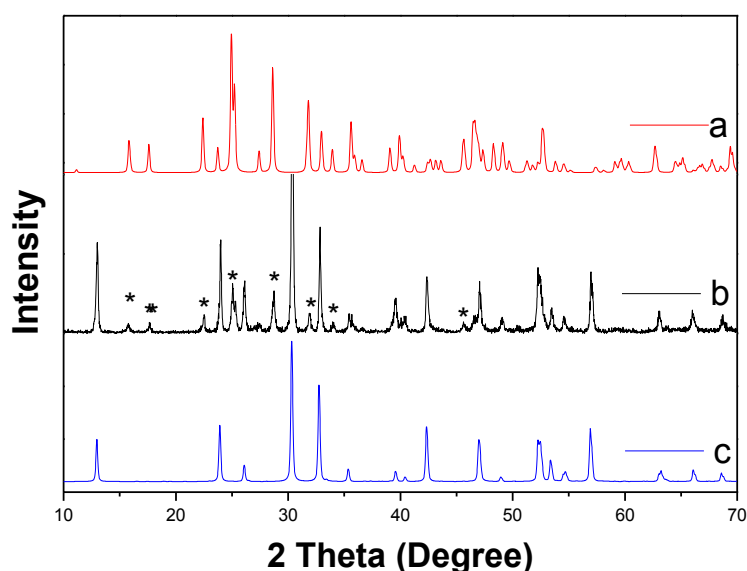

Fig. S1 XRD pattern of obtained 25 mol%  $\text{Bi}_2\text{S}_3/\text{Bi}_2\text{O}_2\text{CO}_3$  composite after further being treated by hydrothermal process at 180 °C for 6hrs (b),  $\text{Bi}_2\text{S}_3$  (JCPDS card No. 17-0320, a) and  $\text{Bi}_2\text{O}_2\text{CO}_3$  (JCPDS card No. 41-1488, c) standard patterns.

Fig. S1 shows that XRD pattern of the obtained 25 mol%  $\text{Bi}_2\text{S}_3/\text{Bi}_2\text{O}_2\text{CO}_3$  composite, which was further treated by hydrothermal process at 180 °C for 6hrs. From which one can see that  $\text{Bi}_2\text{S}_3$  diffraction peaks (JCPDS card No. 17-0320) appear besides of that of  $\text{Bi}_2\text{O}_2\text{CO}_3$  (JCPDS card No. 41-1488). This result indicates that  $\text{Bi}_2\text{S}_3/\text{Bi}_2\text{O}_2\text{CO}_3$  composite can be prepared, and the hydrothermal process is beneficial for the phase transformation of  $\text{Bi}_2\text{S}_3$  from amorphous to crystalline. However, no diffraction peaks of  $\text{Bi}_2\text{S}_3$  can be observed in 5 mol%  $\text{Bi}_2\text{S}_3/\text{Bi}_2\text{O}_2\text{CO}_3$  and 15 mol%  $\text{Bi}_2\text{S}_3/\text{Bi}_2\text{O}_2\text{CO}_3$  composites even they also be treated by hydrothermal process, because of low content of  $\text{Bi}_2\text{S}_3$  and the high diffraction intensity of  $\text{Bi}_2\text{O}_2\text{CO}_3$  which may cover the diffraction peaks of  $\text{Bi}_2\text{S}_3$ .
